# Supplementary material for: De effecten van evacuatiestrategieen op het verloop van grootschalige evacuaties
Source: Royal Society of Chemistry journal article supplement (doi:10.1039/d0bm02005b), 2005-06-19

## Electronic Supplementary Information

### A Water-Soluble Octahedral Molybdenum Cluster Complex as a Potential Agent for X-Ray Induced Photodynamic Therapy

Kaplan Kirakci,\*<sup>1</sup> Tatiana N. Pozmogova,<sup>2,3</sup> Andrey Y. Protasevich,<sup>4</sup> Georgy D. Vavilov,<sup>5</sup> Dmitri V. Stass,<sup>3,6</sup> Michael A. Shestopalov,<sup>4</sup> Kamil Lang\*<sup>1</sup>

<sup>1</sup>*Institute of Inorganic Chemistry of the Czech Academy of Sciences, Řež 1001, 250 68 Husinec-Řež, Czech Republic*

<sup>2</sup>*SPF-vivarium, Institute of Cytology and Genetics, SB RAS, 10 Acad. Lavrentieva ave., Novosibirsk, 630090 Russia*

<sup>3</sup>*Novosibirsk State University, 1 Pirogova st., Novosibirsk, 630090 Russia*

<sup>4</sup>*Nikolaev Institute of Inorganic Chemistry SB RAS, RAS, 3 Acad. Lavrentiev ave., 630090 Novosibirsk, Russia*

<sup>5</sup>*National medical research center for Circulation Pathology n.a. academician E.N. Meshalkin, 15, Rechkunovskaya st., 630055, Novosibirsk, Russia*

<sup>6</sup>*Voevodsky Institute of Chemical Kinetics and Combustion SB RAS, 3 Institutskaya st., Novosibirsk, 630090, Russia*

\* Corresponding authors: kaplan@iic.cas.cz (Kaplan Kirakci), lang@iic.cas.cz (Kamil Lang)

## Content

|                 |                                                                                                                          |
|-----------------|--------------------------------------------------------------------------------------------------------------------------|
| Figure S1       | $^1\text{H}$ NMR spectrum of <b>1</b> in $\text{CDCl}_3$ and the corresponding assignment.                               |
| Figure S2       | Electrospray ionization-mass spectrum of <b>1</b> in the positive mode.                                                  |
| Figure S3       | Absorption spectrum of <b>1</b> in DMSO.                                                                                 |
| Figure S4       | Luminescence emission spectrum of <b>1</b> in DMSO.                                                                      |
| Figure S5       | Absorption spectrum of <b>1</b> in PBS.                                                                                  |
| Figure S6       | Hydrolysis of <b>1</b> .                                                                                                 |
| Figure S7       | Nanoparticle size distribution by number and by intensity of <b>1</b> in PBS solutions.                                  |
| Table S1        | Size distributions and zeta potentials of <b>1</b> in PBS obtained by dynamic light scattering at different aging times. |
| Figure S8       | Phototoxicity of <b>1</b> towards Hep-2 and MRC-5 cells.                                                                 |
| Figure S9       | Survival rate of BALB/C mice injected intravenously with <b>1</b> .                                                      |
| Figures S10-S15 | Histological analyses.                                                                                                   |

Figure S1.  $^1\text{H}$  NMR spectrum of **1** in  $\text{CDCl}_3$  and the corresponding assignment.

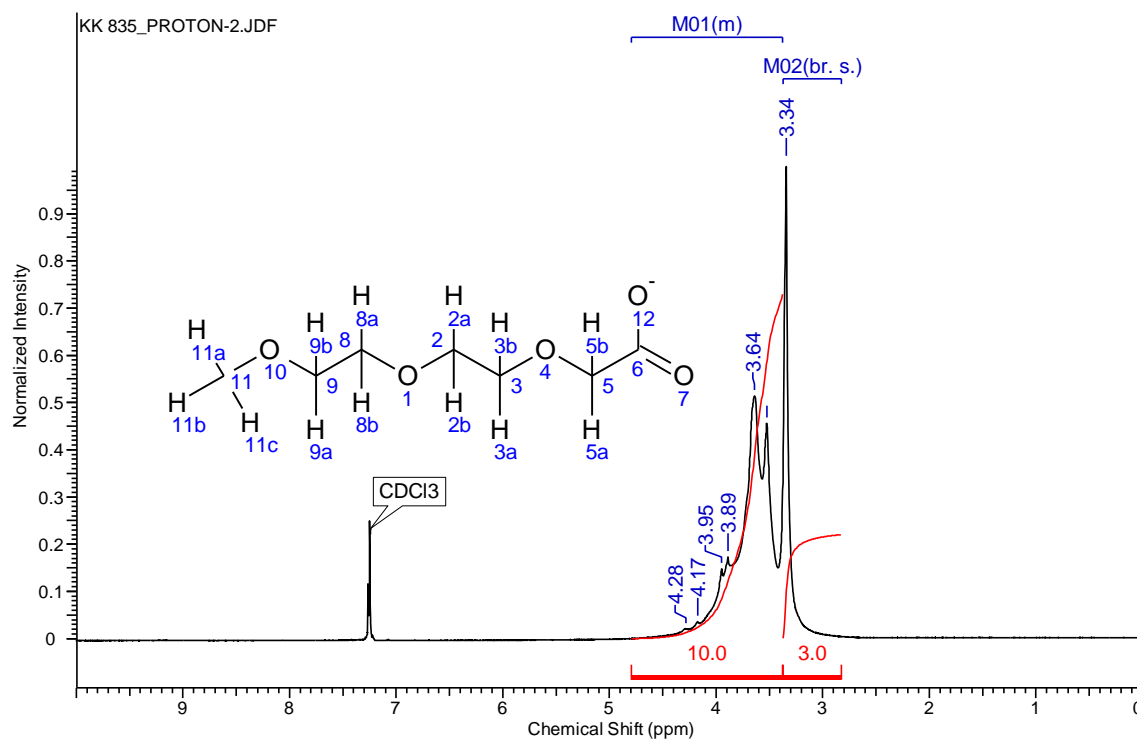

| Multiplet               | $\delta$ (ppm) | Proton assignment                      | Number of protons |
|-------------------------|----------------|----------------------------------------|-------------------|
| M01 (m)                 | 3.34           | 11a, 11b, 11c                          | 3                 |
| M02 (br. s.)            | 3.38 - 4.79    | 2a, 2b, 3a, 3b, 5a, 5b, 8a, 8b, 9a, 9b | 10                |
| Total number of protons |                |                                        | 13                |

Figure S2. Electrospray ionization-mass spectrum of **1** in the positive mode:

(A) fresh solution of **1**, revealing a peak with  $m/z$  of 1365.67 corresponding to  $[\text{Mo}_6\text{I}_8(2\text{-}[2\text{-}(2\text{-methoxyethoxy})\text{ethoxy}]\text{acetate})_6(\text{H}_3\text{O})_4]^{2+}$  ( $m/z = 1365.99$ ).

(B) 3-days old solution of **1**, revealing a peak with  $m/z$  of 1266.50 corresponding to partially hydrolyzed  $[\text{Mo}_6\text{I}_8(2\text{-}[2\text{-}(2\text{-methoxyethoxy})\text{ethoxy}]\text{acetate})_5(\text{H}_2\text{O})(\text{H}_3\text{O})_2]^{2+}$  ( $m/z = 1266.38$ ).

A

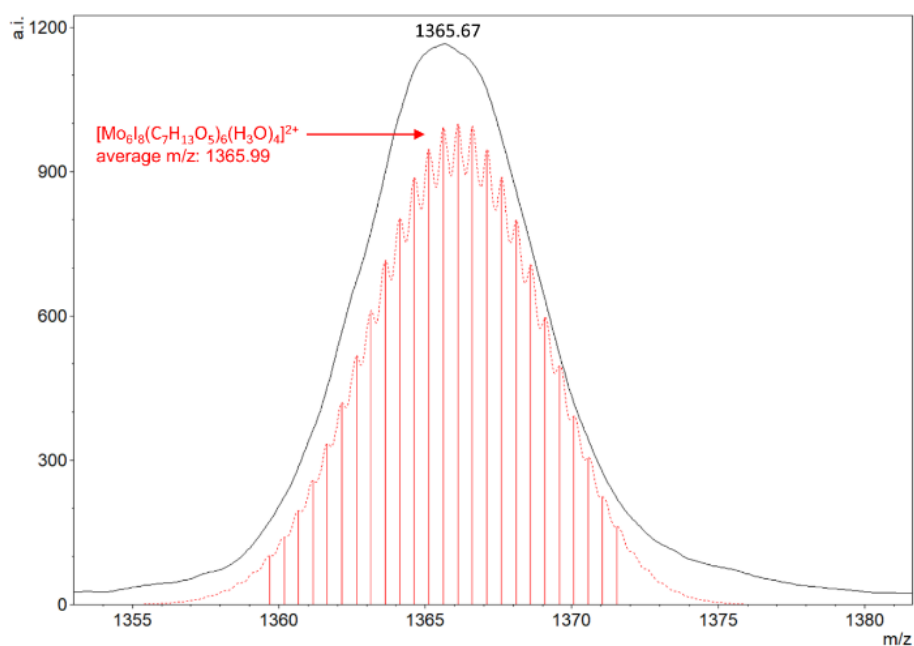

B

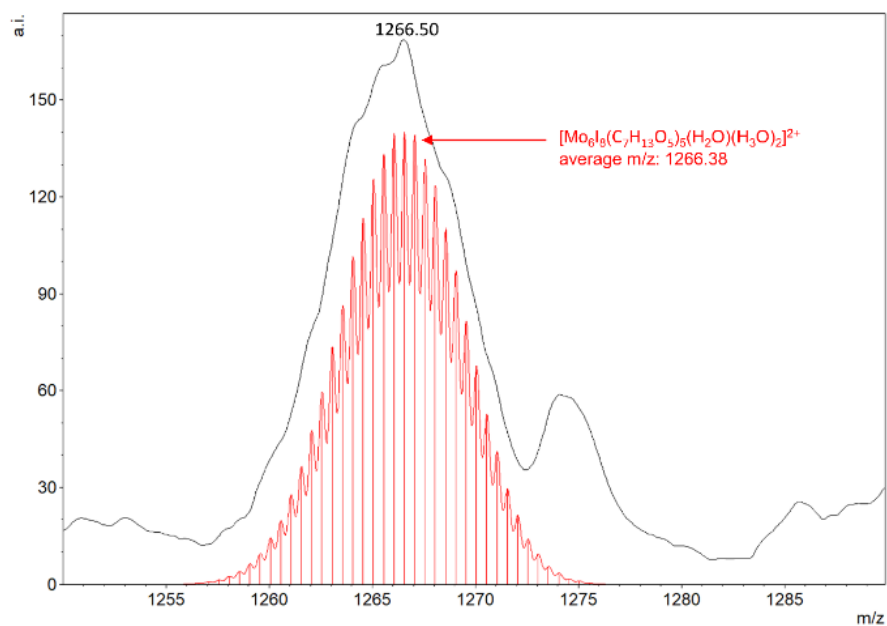

Figure S3. Absorption spectrum of **1** in DMSO.

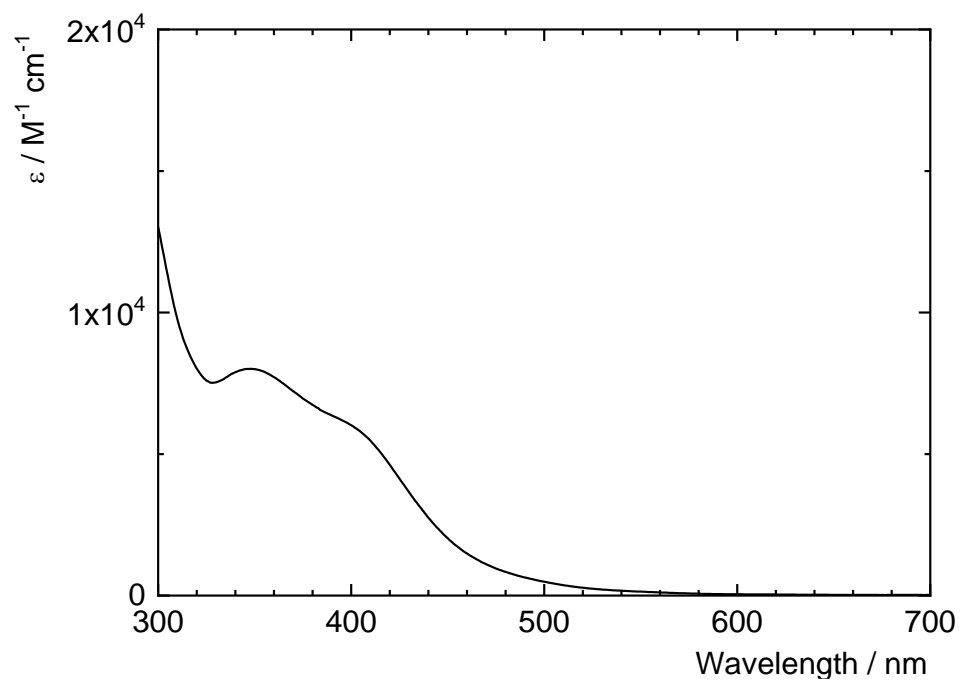

Figure S4. Luminescence emission spectrum of **1** in air-saturated (black) and Ar-saturated DMSO (red). The samples were excited at 400 nm.

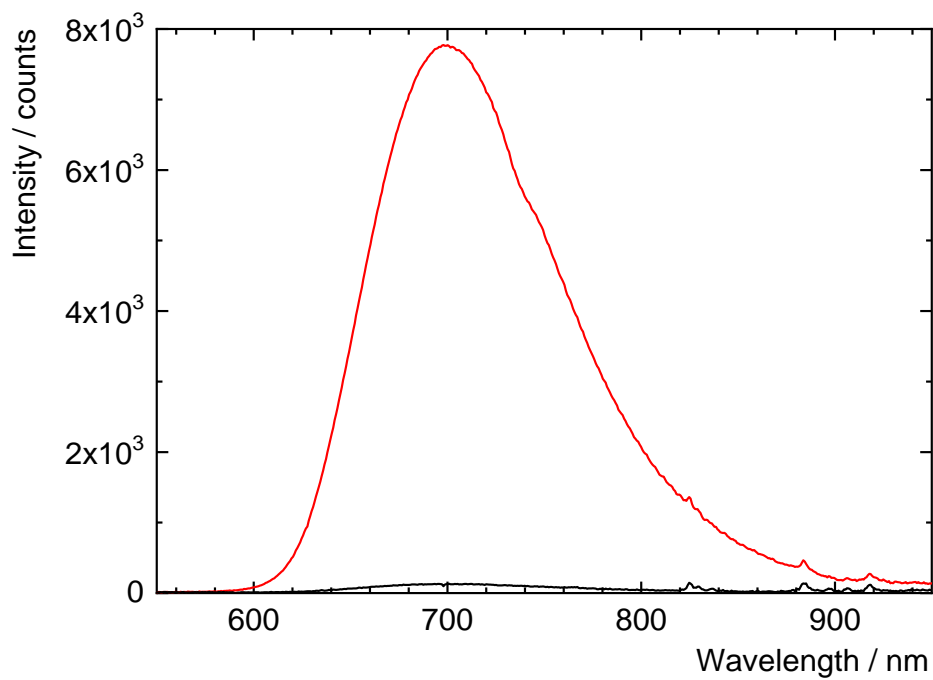

Figure S5. Absorption spectrum of **1** in PBS, fresh solution (a) and three-days old solution (b).

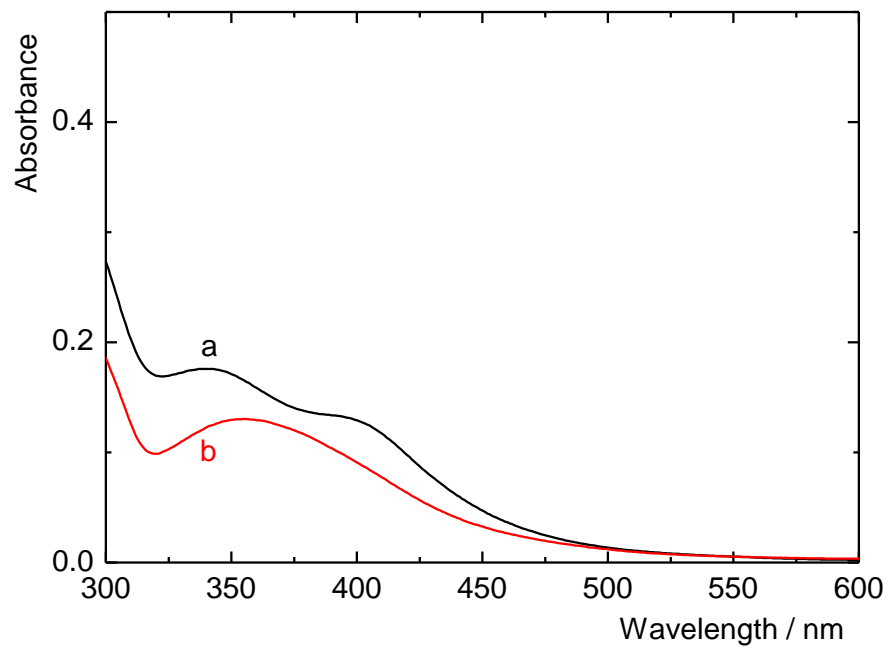

Figure S6. Hydrolysis of **1**:

(A) Kinetics of hydrolysis of micromolar concentrations of **1** in argon-saturated PBS measured by the time dependence of luminescence quantum yields (Table 1 for details).

(B) Luminescence emission band of  $O_2(^1\Delta_g)$  produced by **1** in three-days old oxygen-saturated PBS (excited at 400 nm).

A

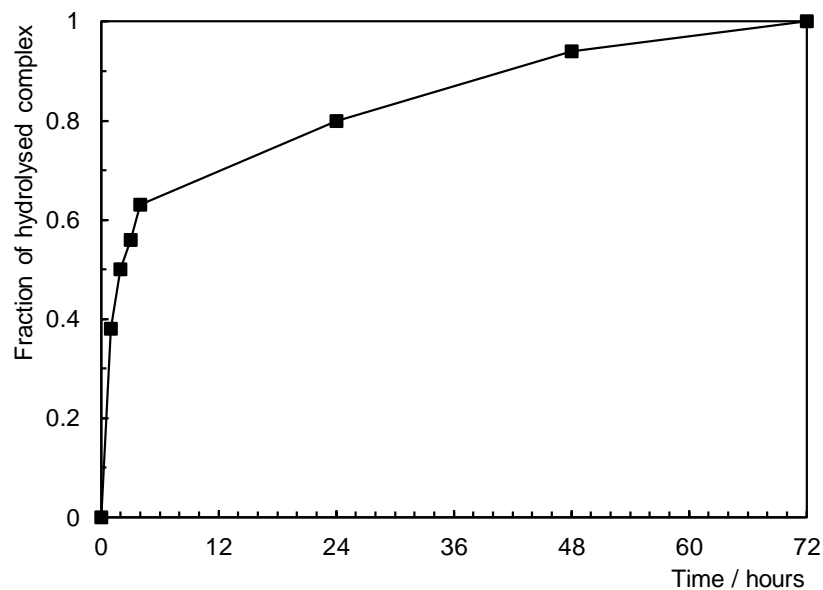

B

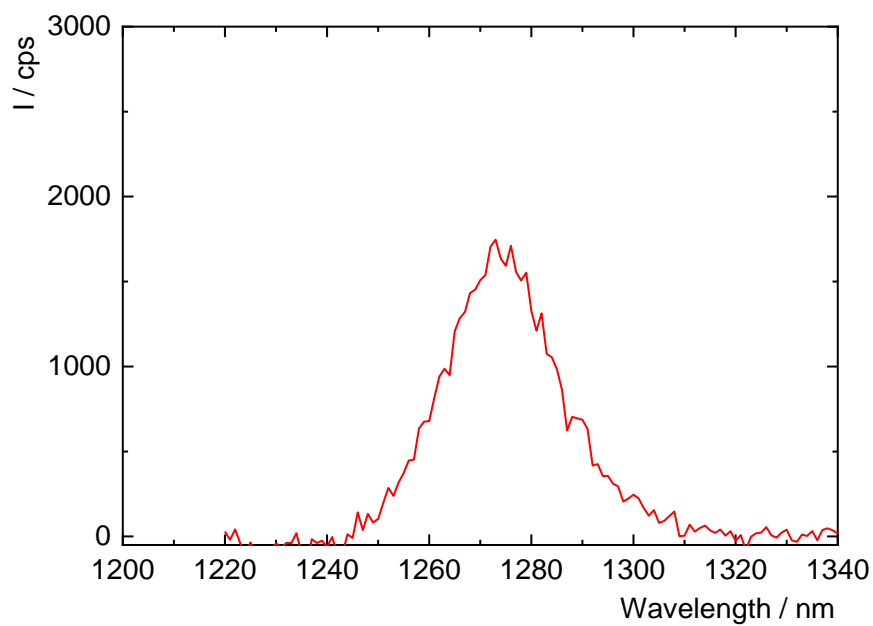

Figure S7. Nanoparticle size distribution by number (A) and by intensity (B) of PBS solutions of approximately 10  $\mu\text{M}$  **1** obtained by dynamic light scattering at different aging times (red: fresh solution, green: after 4 h, blue: after 2 days, black: after 3 days). The results are summarized in Table S1 at the bottom.

A

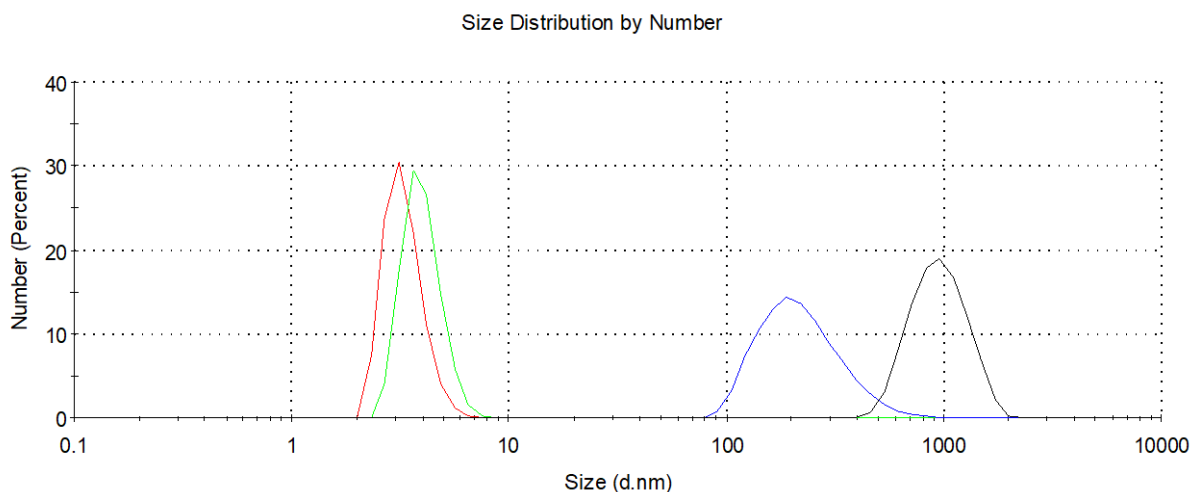

B

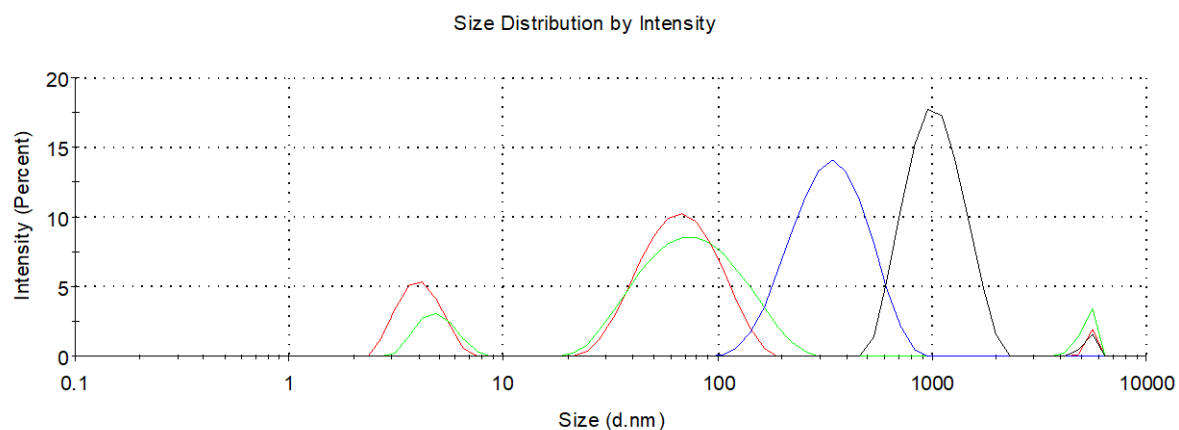

Table S1. Size distributions and zeta potentials of **1** in PBS obtained by dynamic light scattering at different aging times. PdI is the polydispersity index.

| Time   | Diameter / nm | Z-average / nm | PdI  | Zeta potential / mV |
|--------|---------------|----------------|------|---------------------|
| Fresh  | $3.3 \pm 0.7$ | 117            | 0.15 | $-3.8 \pm 1.2$      |
| 4 h    | $4.0 \pm 0.8$ | 105            | 0.18 | $-5.8 \pm 0.8$      |
| 1 day  | $232 \pm 104$ | 313            | 0.29 | $-7.8 \pm 0.5$      |
| 3 days | $976 \pm 278$ | 1064           | 0.26 | $-12.3 \pm 1.1$     |



Figure S8. Phototoxicity of 0.08 mM **1** towards Hep-2 (A) and MRC-5 (B) cells with indicated incubation time. Phototoxicity of **1** (red) after irradiation with a 500 W halogen lamp ( $\lambda \geq 400$  nm, light dose of approximately  $20 \text{ J cm}^{-2}$ ) was compared with corresponding experiments in dark (black) The bars labeled “control” represent negative control experiments in the absence of **1**. Data are presented with the corresponding standard error of the mean.

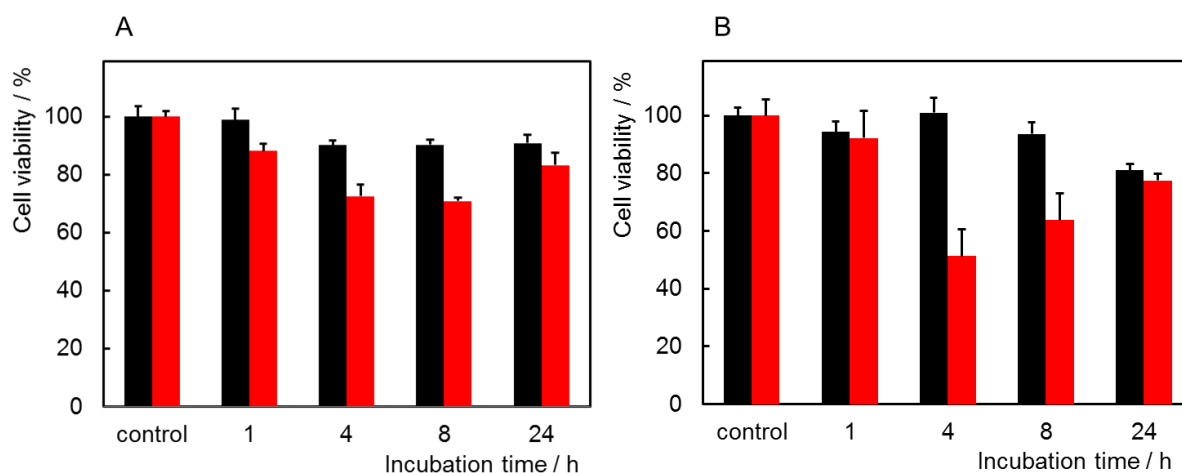

Figure S9. Survival rate of BALB/C mice injected intravenously with 200  $\mu\text{L}$  of **1** dissolved in water in concentrations 24, 47, 95, 189, and 284  $\text{mg mL}^{-1}$ , i.e. 158, 315, 630, 1260, and 1890 mg of **1** *per* kg of the mouse model (5 mice in a group). The animals were monitored for 2 weeks. The death of animals that received doses of 315 and 630 mg/kg occurred within 3 days, and doses of 1260 and 1890 mg/kg led to the death within a day after administration.

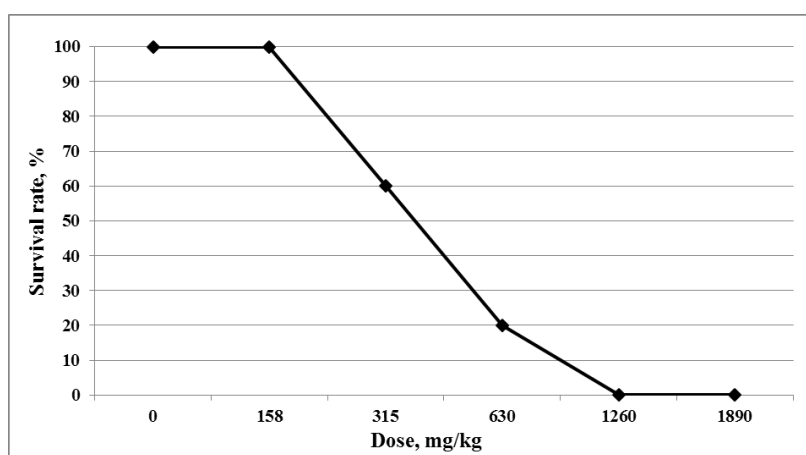

Figure S10. Histological analysis of the kidney, magnification  $\times 20$ .

A – control (physiological saline);

B – dose 158 mg/kg;

C – dose 315 mg/kg;

D – dose 630 mg/kg.

After administration of the maximal dose, a large hemorrhage into the internal tissues of the kidney (blue arrow) and the site of renal glomerular necrosis are noticeable (green arrow).

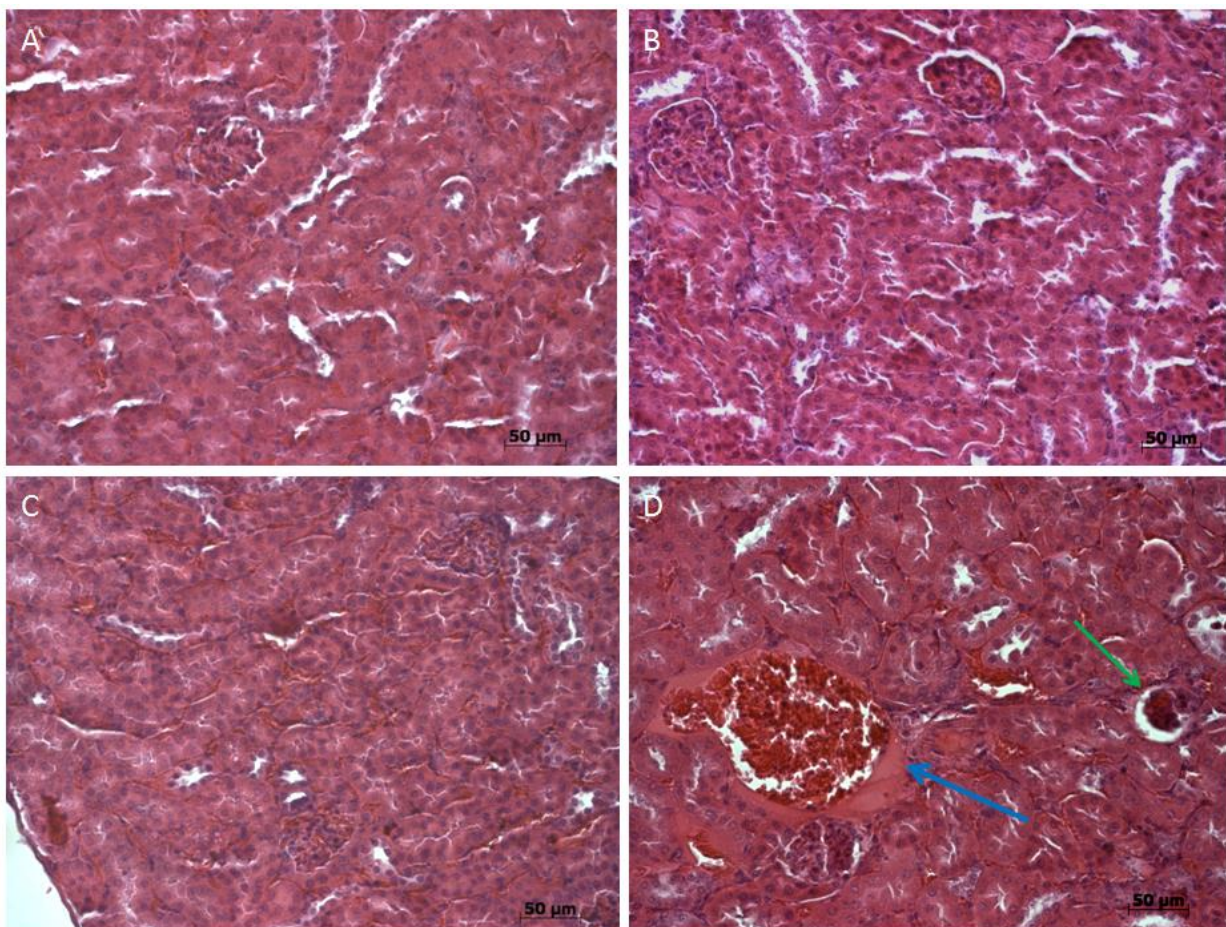



Figure S11. Histological analysis of the kidney, magnification  $\times 40$ .

A – control (physiological saline);

B – dose 158 mg/kg;

C – dose 315 mg/kg;

D – dose 630 mg/kg.

After administration of doses of 315 and 630 mg/kg, the areas of renal tubular cell dystrophy (red arrows) are noticeable. In addition, renal glomerular necrosis (green arrow) is often observed in the kidney after administration of a dose of 630 mg/kg.

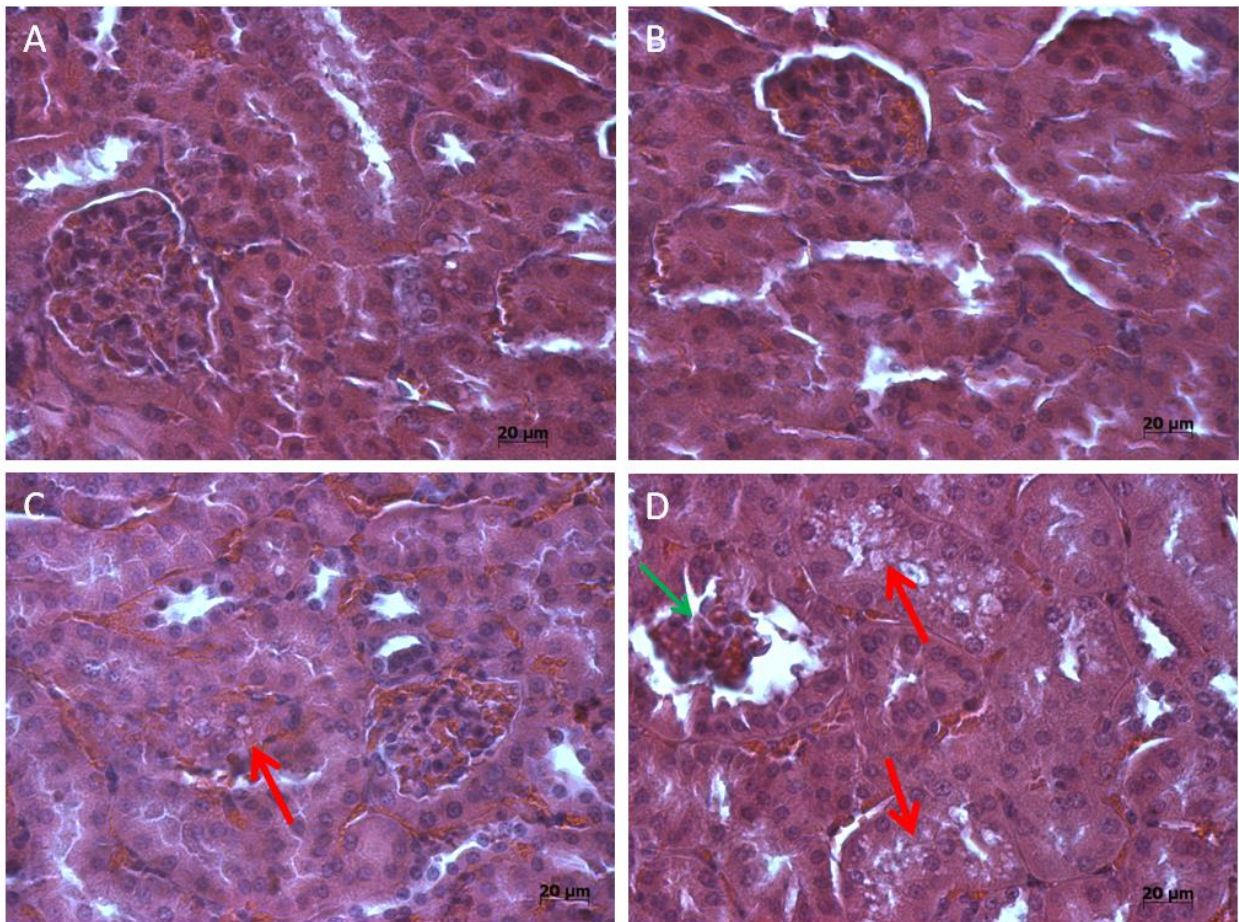

Figure S12. Histological analysis of the liver, magnification  $\times 10$ .

A – control (physiological saline);

B – dose 158 mg/kg;

C – dose 315 mg/kg;

D – dose 630 mg/kg.

After administration of a dose of 630 mg/kg, an increase in blood vessels filling is clearly noticeable (blue arrows). However, there are no visible areas of dystrophic changes.

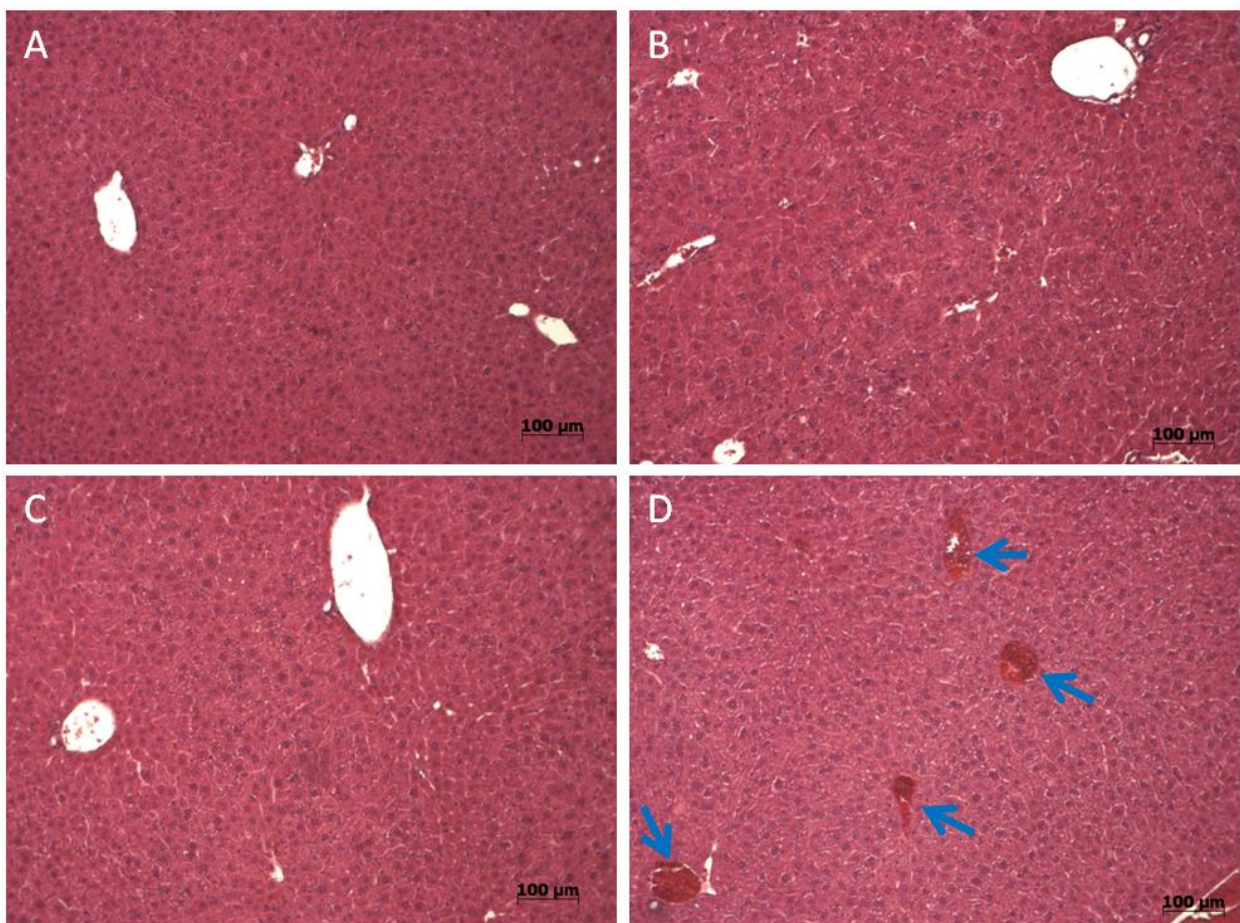



Figure S13. Histological analysis of the heart, magnification  $\times 20$ .

A – control (physiological saline);

B – dose 158 mg/kg;

C – dose 315 mg/kg;

D – dose 630 mg/kg.

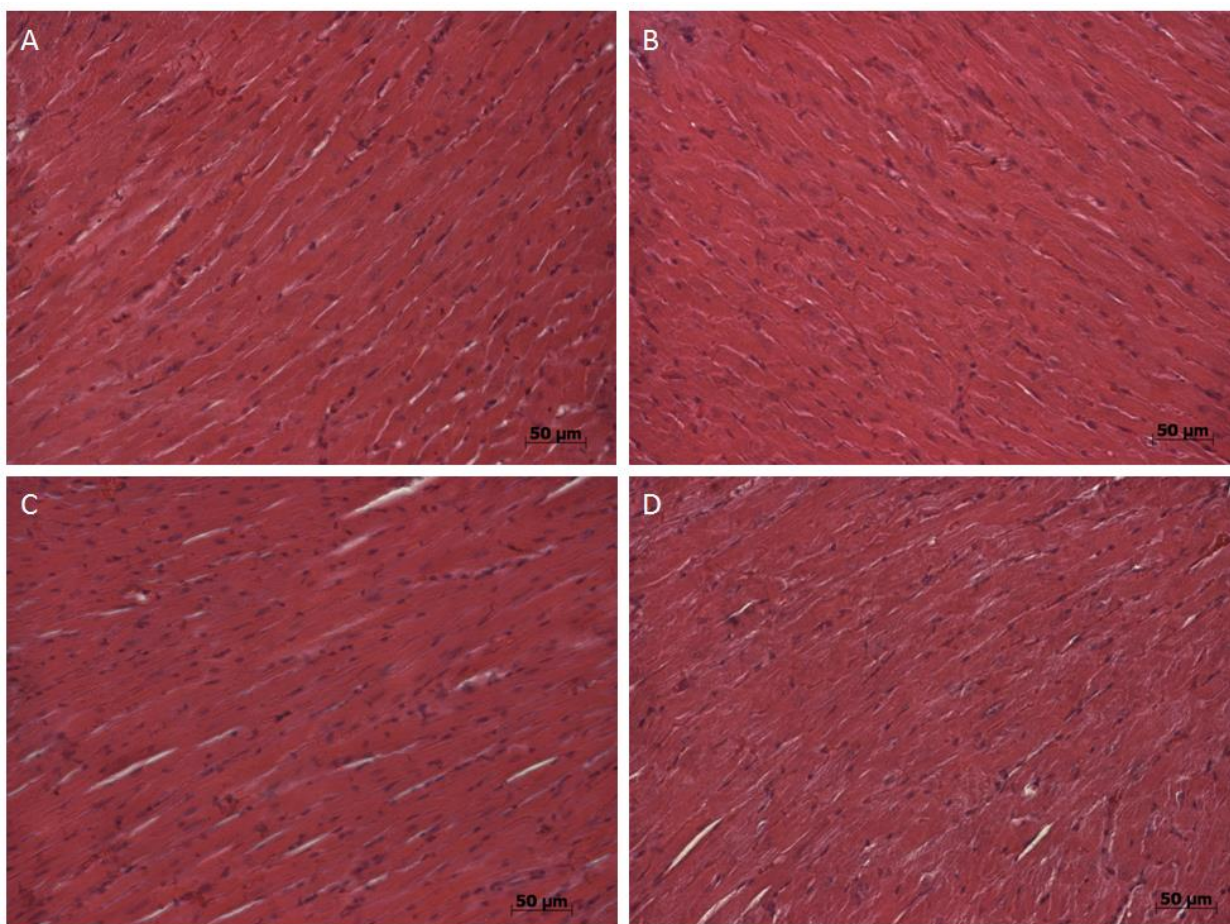

Figure S14. Histological analysis of the lung, magnification  $\times 20$ .

A – control (physiological saline);

B – dose 158 mg/kg;

C – dose 315 mg/kg;

D – dose 630 mg/kg.

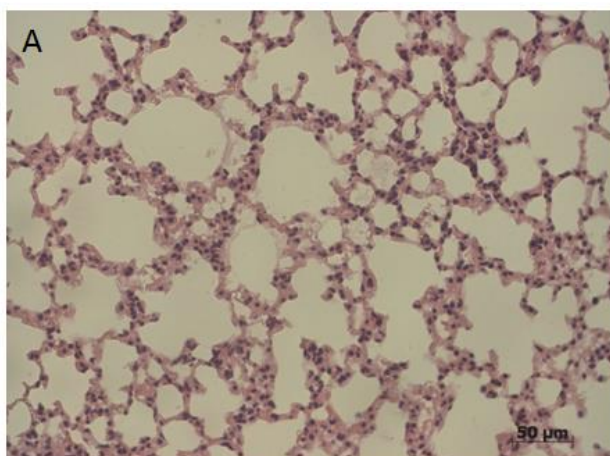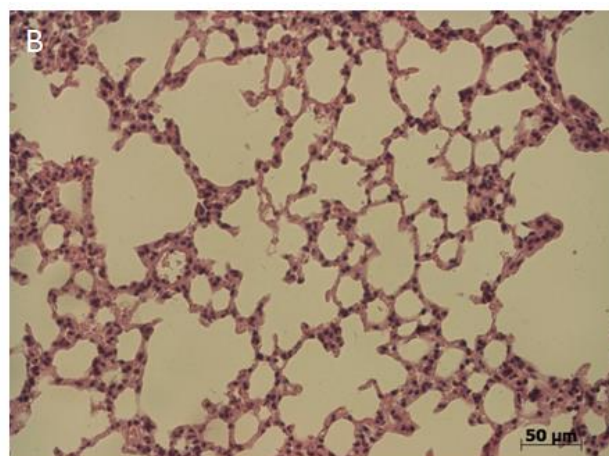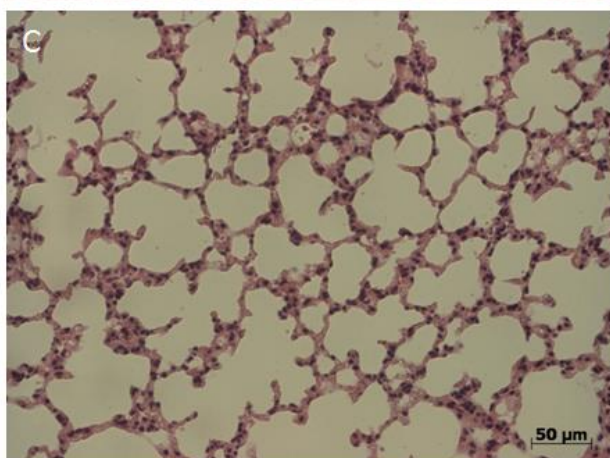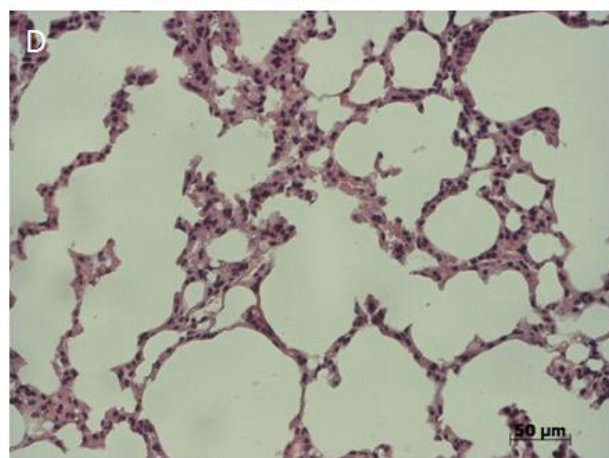



Figure S15. Histological analysis of the spleen, magnification  $\times 10$ .

A – control (physiological saline);

B – dose 158 mg/kg;

C – dose 315 mg/kg;

D – dose 630 mg/kg.

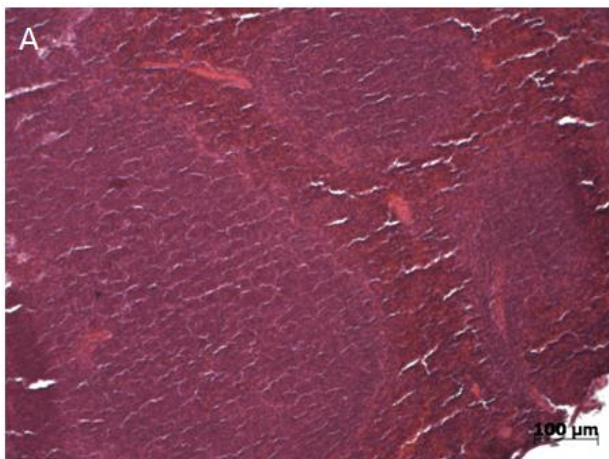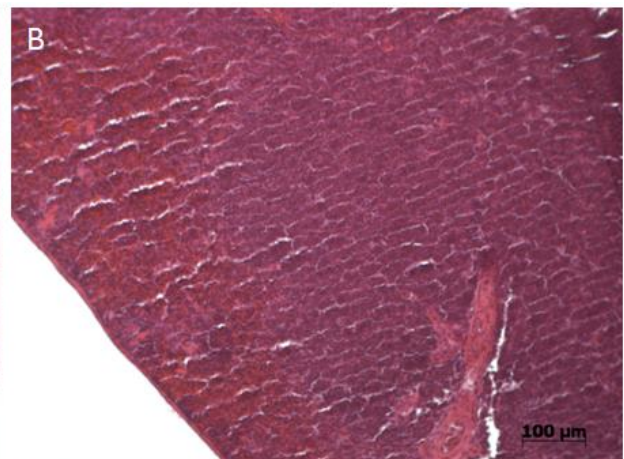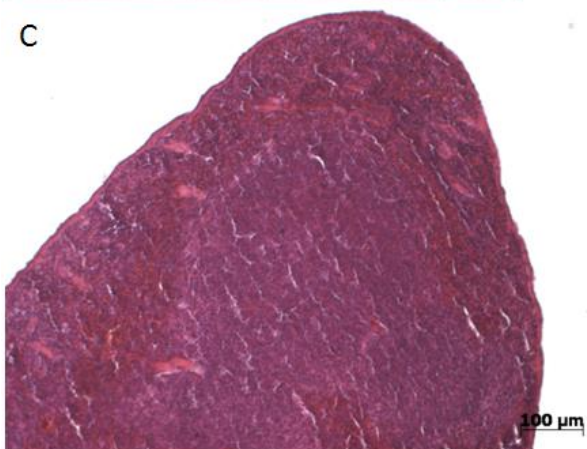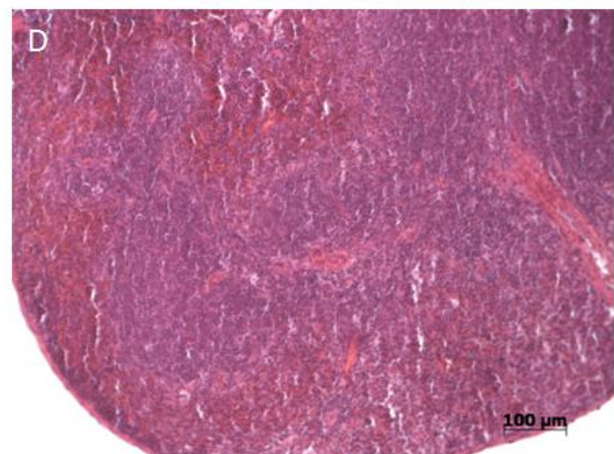

Supplement: d0bm02005b1.pdf [file d0bm02005b1.pdf]
